# Supplementary material for: Effects of Acid-Anhydride-Modified Cellulose Nanofiber on Poly(Lactic Acid) Composite Films
Source: PubMed Central journal article supplement (PMC8002836; doi:10.3390/nano11030753), 2021-03-17
Supplement: nanomaterials-11-00753-s001.pdf [file nanomaterials-11-00753-s001.pdf]

# Supplementary Materials

## Effects of Acid-Anhydride-Modified Cellulose Nanofiber on Poly(Lactic Acid) Composite Films

Naharullah Jamaluddin, Yu-I Hsu \*, Taka-Aki Asoh and Hiroshi Uyama \*

Department of Applied Chemistry, Graduate School of Engineering, Osaka University, 2-1 Yamadaoka, Suita, Osaka 565-0871, Japan; naharullah@chem.eng.osaka-u.ac.jp (N.J.); asoh@chem.eng.osaka-u.ac.jp (T.-A.A.)

\* Correspondence: yuihsu@chem.eng.osaka-u.ac.jp (Y.-I.H.); uyama@chem.eng.osaka-u.ac.jp (H.U.); Tel.: +81-6-6879-7364 (Y.-I.H.); (H.U.), Fax: +81-6-6879-7367 (Y.-I.H.); (H.U.)

### Derivation of the equations from EDX spectroscopy

1. CNF = C<sub>6</sub>H<sub>10</sub>O<sub>5</sub> ( $M_w = 162$  g/mol)

Mass percentages (excluding H): C = 47.3%, O = 52.7%

$$\text{Theoretical ratio of C:O} = \frac{C}{O} = \frac{47.3}{52.7} = 0.897$$

2. Assuming that 100% CNF is modified to CNFa,

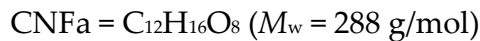

Mass percentages (excluding H): C = 52.9%, O = 47.1%

A% = percentage of CNF acetylate (CNFa)

$$B = \text{ratio of C: O} = \frac{C}{O}$$

$$B = \frac{C}{O} = \frac{M_w \text{ of single C} [\text{No of C acetylate (A\%)+No of C in CNF (100\%-A\%)]}{M_w \text{ of single O} [\text{No of O acetylate (A\%)+No of O in CNF (100\%-A\%)]}$$

$$B = \frac{C}{O} = \frac{12[12(A\%)+6(100\%-A\%)]}{16[8(A\%)+5(100\%-A\%)]}$$

Simplify A%:

$$A\% = \frac{900-1000B}{6B-9} \quad (\text{S1})$$

3. Assuming that 100% CNF is modified to CNFp,

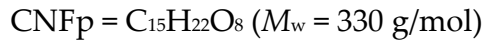

Mass percentages (excluding H): C = 58.4%, O = 41.6%

P% = percentage of CNF propionate (CNFp)

$$B = \text{ratio of C: O} = \frac{\text{C}}{\text{O}}$$

$$B = \frac{\text{C}}{\text{O}} = \frac{M_w \text{ of single C} [\text{No of C propionate (P\%)} + \text{No of C in CNF (100\% - P\%)}]}{M_w \text{ of single O} [\text{No of O propionate (P\%)} + \text{No of O in CNF (100\% - P\%)}]}$$

$$B = \frac{\text{C}}{\text{O}} = \frac{12[15(P\%) + 6(100\% - P\%)]}{16[8(P\%) + 5(100\% - P\%)]}$$

Simplify P%:

$$P\% = \frac{200(10B - 9)}{3(9 - 4B)} \quad (\text{S2})$$

4. Assuming that 100% CNF is modified to CNFb,

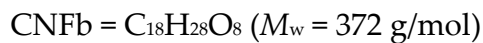

Mass percentages (excluding H): C = 62.8%, O = 37.2%

B% = percentage of CNF butyrate (CNFb)

$$B = \text{ratio of C: O} = \frac{\text{C}}{\text{O}}$$

$$B = \frac{\text{C}}{\text{O}} = \frac{M_w \text{ of single C} [\text{No of C butyrate (B\%)} + \text{No of C in CNF (100\% - B\%)}]}{M_w \text{ of single O} [\text{No of O butyrate (B\%)} + \text{No of O in CNF (100\% - B\%)}]}$$

$$B = \frac{\text{C}}{\text{O}} = \frac{12[18(B\%) + 6(100\% - B\%)]}{16[8(B\%) + 5(100\% - B\%)]}$$

Simplify B%:

$$B\% = \frac{450 - 500B}{3(B - 3)} \quad (\text{S3})$$

5. Degree of substitution (DS) =  $\frac{\text{percentage modified}}{100\%} \times 3$  (S4)

From the EDX instrument, the value of  $B$  can be obtained, which is the C:O mass ratio. Therefore, the DS of m-CNF can be calculated from the derived equations. The full details of the results from EDX analysis, including the CNF, are given in **Table S1**.

**Table S1.** Details of the mass concentrations obtained from EDX analysis.

| Species | Mass concentration (%) |      | Ratio of C:O | Percent modified (%) | Degree of substitutions (DS) |
|---------|------------------------|------|--------------|----------------------|------------------------------|
|         | C                      | O    |              |                      |                              |
| CNF     | 47.7                   | 52.3 | 0.91         | 0                    | 0                            |
| CNFa1   | 48.6                   | 51.4 | 0.95         | 13.7                 | 0.41                         |
| CNFa2   | 49.5                   | 50.5 | 0.98         | 25.0                 | 0.75                         |
| CNFa4   | 49.7                   | 50.3 | 0.99         | 29.4                 | 0.88                         |
| CNFp1   | 50.3                   | 49.7 | 1.01         | 15.1                 | 0.45                         |
| CNFp2   | 52.1                   | 47.9 | 1.09         | 26.9                 | 0.81                         |
| CNFp4   | 52.7                   | 47.3 | 1.11         | 31.4                 | 0.94                         |
| CNFb1   | 50.4                   | 49.6 | 1.02         | 9.8                  | 0.29                         |
| CNFb2   | 51.9                   | 48.1 | 1.08         | 15.5                 | 0.47                         |
| CNFb4   | 53.9                   | 46.1 | 1.17         | 24.5                 | 0.74                         |

**Morphology of m-CNF from SEM images.**

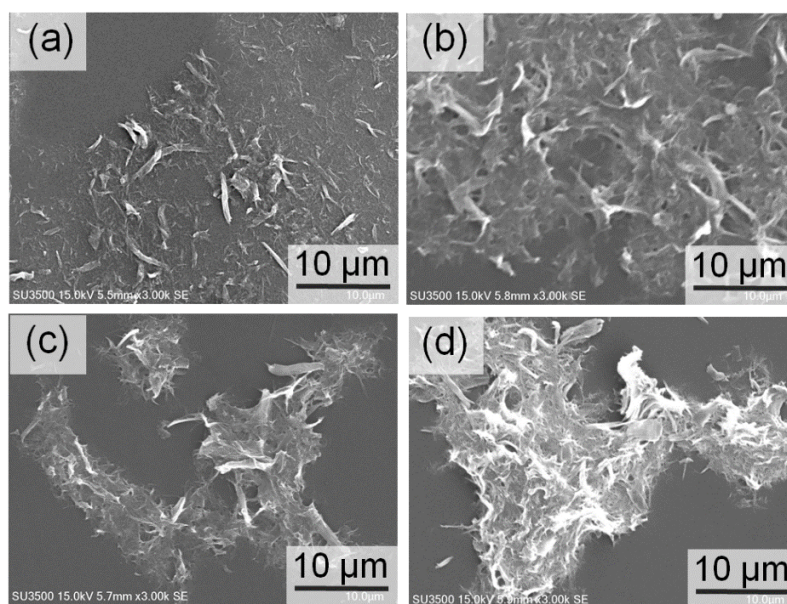

**Figure S1.** SEM images of (a) CNF, (b) CNFa4 (DS = 0.88), (c) CNFp4 (DS = 0.94), and (d) CNFb4 (DS = 0.74) at  $\times 3000$  magnification.

Mechanical properties of PLA/m-CNF composite films from stress-strain curves.

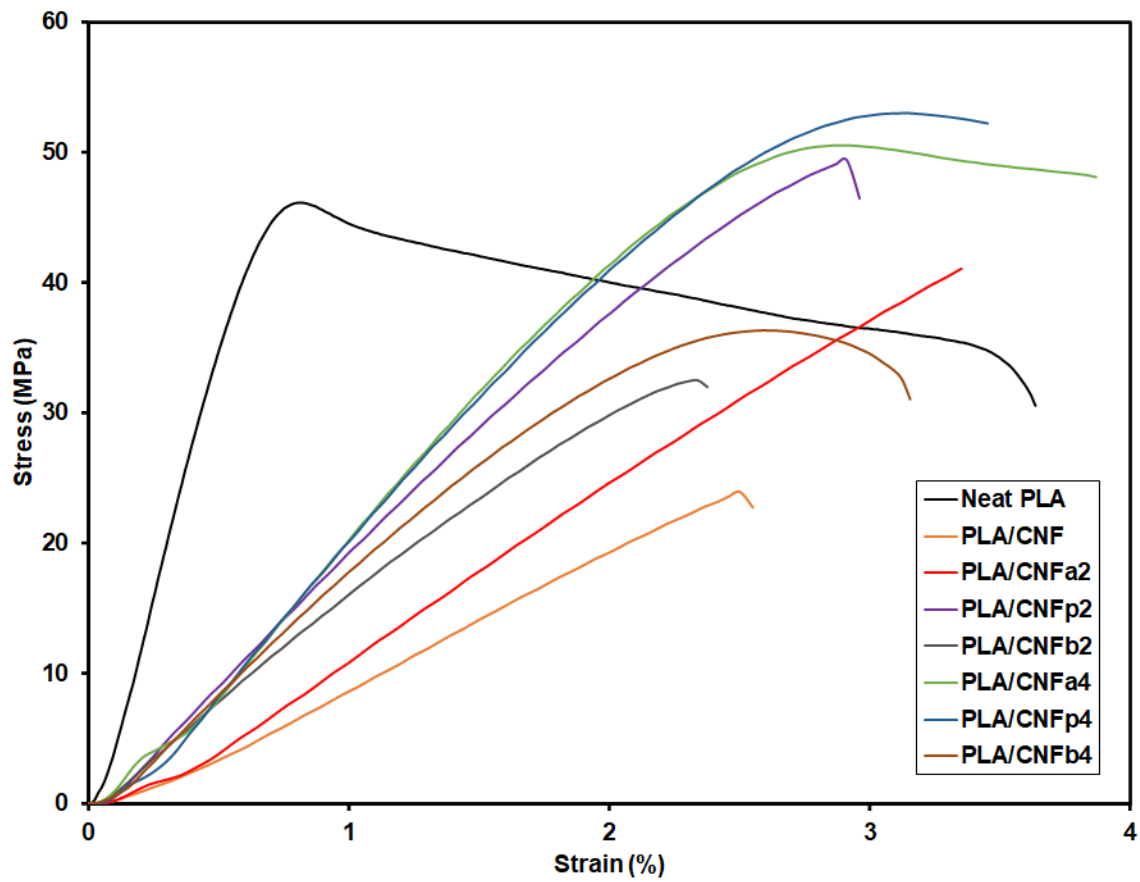

Figure S2. Stress-strain curves of PLA/m-CNF composite films.

Thermal properties of PLA/m-CNF composite films for the degree of crystallinity.

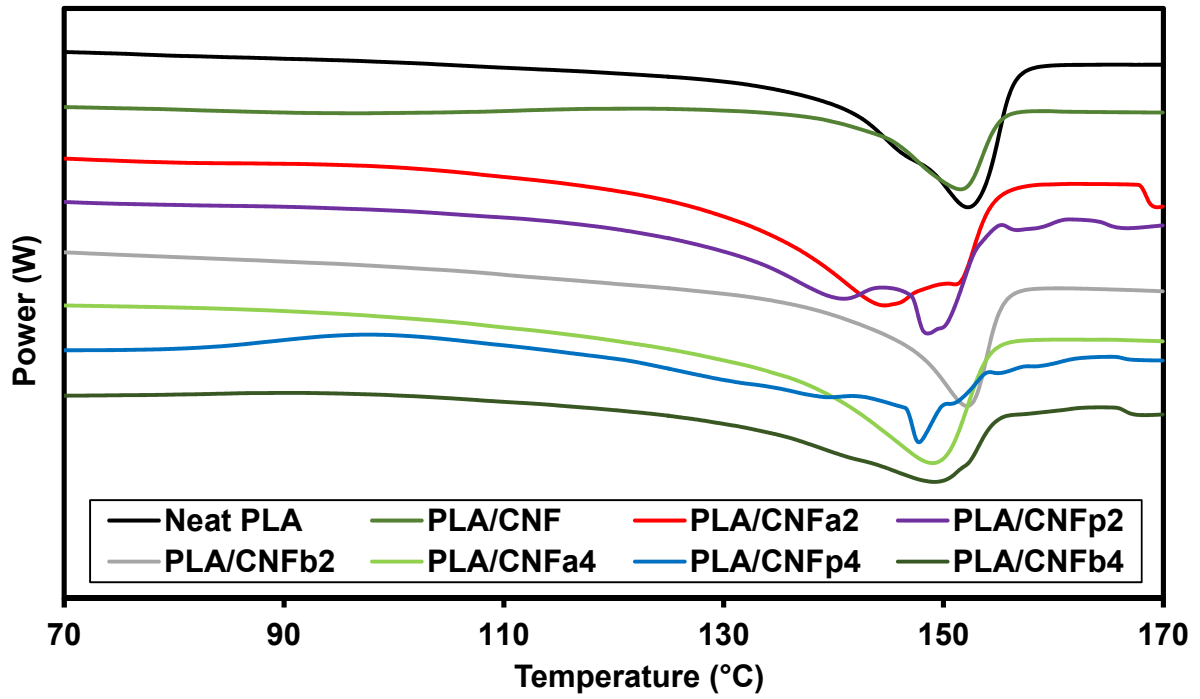

Figure S3. DSC thermograms of PLA/m-CNF composite films.
